# Supplementary material
Source: publisher site journal article supplement (https://www.dovepress.com/article/404377)
Supplement: Supplementary file 1 [file get_supplementary_file.php]

**SLOVAK VERSION OF INSTRUMENT**

Vážená/ý pani/pán,

v mene výskumného tímu z Jesseniovej lekárskej fakulty UK v Martine by sme Vás chceli poprosiť o vyplnenie dotazníka, ktorého cieľom je zistiť kvalitu života a zdravotný stav **po prekonaní ochorenia COVID-19**.

Vyplnenie dotazníka je jednoduché a zaberie maximálne 10 minút Vášho času. Prosíme Vás o úprimnosť vo Vašich odpovediach. Všetky Vami poskytnuté údaje budú slúžiť výlučne na vedecké účely. Štúdia bola schválená Etickou komisiou UNM (EK UNM č. 71/2022).

Vyplnením dotazníka potvrdzujete, že súhlasíte s účasťou v tejto štúdií a Vaša účasť je dobrovoľná.

Za ochotu a spoluprácu Vám vopred ďakujeme!

Vyznačte jednu odpoveď, ktorá najlepšie vystihuje Vaše pocity

|  | **Otázky** | **1** | **2** | **3** | **4** | **5** |
| --- | --- | --- | --- | --- | --- | --- |
| 1 | Zažívam pocity zlej nálady (vrátane plačlivosti) | ani raz | zriedka | raz za čas | často | vždy |
| 2 | Zažívam pocity hnevu | ani raz | zriedka | raz za čas | často | vždy |
| 3 | Cítim sa izolovaný alebo osamelý pre účinky dlhodobého COVIDu | ani raz | zriedka | raz za čas | často | vždy |
| 4 | Moja motivácia venovať sa mojím pravidelným činnostiam je | veľmi slabá | slabá | primeraná | dobrá | vynikajúca |
| 5 | Cítim obavy o moje budúce zdravie vo všeobecnosti | ani raz | zriedka | raz za čas | často | vždy |
| 6 | Cítim úzkosť najmä z toho, že znova ochoriem na COVID-19 | ani raz | zriedka | raz za čas | často | vždy |
| 7 | Cítim úzkosť o budúce zdravie mojich detí | ani raz | zriedka | raz za čas | často | vždy |
| 8 | Cítim obavy o moje budúce vzťahy s mojou rodinou | ani raz | zriedka | raz za čas | často | vždy |
| 9 | Cítim úzkosť o moju budúcu finančnú situáciu | ani raz | zriedka | raz za čas | často | vždy |
| 10 | Cítim úzkosť, že som závislým alebo bremenom pre mojich príbuzných alebo iných (ako je charita) | ani raz | zriedka | raz za čas | často | vždy |
| 11 | Cítim úzkosť bez zjavného dôvodu | ani raz | zriedka | raz za čas | často | vždy |
| 12 | Cítim úzkosť z prežívania spomienok na traumatické udalosti | ani raz | zriedka | raz za čas | často | vždy |
| 13 | Moja schopnosť spracovávať informácie a usporiadať si myšlienky je | veľmi slabá | slabá | primeraná | dobrá | vynikajúca |
| 14 | Moja schopnosť sústrediť sa/koncentrovať na vykonávanie domácich prác je | veľmi slabá | slabá | primeraná | dobrá | vynikajúca |
| 15 | Moja schopnosť vyjadriť sa slovne je | veľmi slabá | slabá | primeraná | dobrá | vynikajúca |
| 16 | Duševná námaha ma veľmi unavuje | ani raz | zriedka | raz za čas | často | vždy |
| 17 | Duševná námaha mi spúšťa okamžite bolesť hlavy | ani raz | zriedka | raz za čas | často | vždy |
| 18 | Duševná námaha mi spúšťa pozáťažovú malátnosť | ani raz | zriedka | raz za čas | často | vždy |
| 19 | Fyzická námaha mi spôsobuje bolesť na hrudi | ani raz | zriedka | raz za čas | často | vždy |
| 20 | Fyzická námaha mi spôsobuje dýchavičnosť | ani raz | zriedka | raz za čas | často | vždy |
| 21 | Fyzická námaha ma veľmi unavuje | ani raz | zriedka | raz za čas | často | vždy |
| 22 | Moja schopnosť vykonávať každodenné práce pre vyčerpanosť je | veľmi slabá | slabá | primeraná | dobrá | vynikajúca |
| 23 | Moja schopnosť zúčastňovať sa na spoločenských akciách pre vyčerpanosť je | veľmi slabá | slabá | primeraná | dobrá | vynikajúca |
| 24 | Moja schopnosť starať sa o môjho manžela/manželku alebo deti je | veľmi slabá | slabá | primeraná | dobrá | vynikajúca |
| 25 | Moja schopnosť umyť sa a obliecť je | veľmi slabá | slabá | primeraná | dobrá | vynikajúca |
| 26 | Zažívam bolesť v mojich kĺboch | ani raz | zriedka | raz za čas | často | vždy |
| 27 | Moja schopnosť šoférovať je momentálne | veľmi slabá | slabá | primeraná | dobrá | vynikajúca |
| 28 | Moja schopnosť používať verejnú dopravu pre dlhodobý COVID je | veľmi slabá | slabá | primeraná | dobrá | vynikajúca |
| 29 | Cítim sa ospalý/ospalá počas dňa | ani raz | zriedka | raz za čas | často | vždy |
| 30 | Moja schopnosť vychutnať si jedlo je (kvôli tomu, že ho nemôžem cítiť alebo ochutnať) | veľmi slabá | slabá | primeraná | dobrá | vynikajúca |
| 31 | Moja schopnosť vychutnať si alkohol je (kvôli tomu, že ho nemôžem cítiť alebo ochutnať) | veľmi slabá | slabá | primeraná | dobrá | vynikajúca |
| 32 | Keď zažívam dýchavičnosť, moja schopnosť rozprávať sa je ovplyvnená | ani raz | zriedka | raz za čas | často | vždy |
| 33 | Moja schopnosť vykonávať jemné úlohy mojimi prstami (napríklad poslať textové správy na mobile) je | veľmi slabá | slabá | primeraná | dobrá | vynikajúca |
| 34 | Môj záujem o pohlavný styk je | veľmi slabý | slabý | primeraný | dobrý | vynikajúci |
| 35 | Moja fyzická izolácia od mojich členov rodiny pre dlhodobý COVID je | žiadna | veľmi slabá | slabá | mierna | vážna |
| 36 | Moja fyzická izolácia od mojich priateľov pre dlhodobý COVID je | žiadna | veľmi slabá | slabá | mierna | vážna |
| 37 | Môj vzťah s manželom/manželkou/ alebo partnerom/partnerkou je | veľmi slabý | slabý | primeraný | dobrý | vynikajúci |
| 38 | Môj vzťah s tými, ktorí sú na mne závislí je | veľmi slabý | slabý | primeraný | dobrý | vynikajúci |
| 39 | Môj vzťah s mojimi priateľmi a kolegami je | veľmi slabý | slabý | primeraný | dobrý | vynikajúci |
| 40 | Moje emočné vypätie ma vyčerpáva | ani raz | zriedka | raz za čas | často | vždy |
| 41 | Moja schopnosť venovať sa mojim bežným záľubám alebo rekreačným aktivitám je | veľmi slabá | slabá | primeraná | dobrá | vynikajúca |
| 42 | Moja práceschopnosť je | veľmi slabá | slabá | primeraná | dobrá | vynikajúca |
| 43 | Vplyv na môj kariérny postup v dôsledku choroby alebo práceneschopnosti je | žiadny | veľmi slabý | slabý | mierny | vážny |
| 44 | Strata príjmu pre moju práceneschopnosť je | žiadna | veľmi slabá | slabá | mierna | vážna |

**PAC-19QoL Scale**

**ENGLISH (ORIGINAL) VERSION OF INSTRUMENT**

Jandhyala R. Design, validation and implementation of the post-acute (long) COVID-19 quality of life (PAC-19QoL) instrument. Health Qual Life Outcomes. 2021;19(1):229. Published 2021 Sep 28. doi:10.1186/s12955-021-01862-1

*The instrument can only be used with written permission from the author.*

|  |  | Items | Questions | Option 1 | Option 2 | Option 3 | Option 4 | Option 5 |
| --- | --- | --- | --- | --- | --- | --- | --- | --- |
| Psychological | **Mood** | 1 | I experience feelings of low mood (including tearfulness) | None of the time | Rarely | Some of the time | Often | All of the time |
| 2 | I experience feelings of anger | None of the time | Rarely | Some of the time | Often | All of the time |
| **Isolation** | 3 | I feel isolated or lonely due the effects of long-COVID | None of the time | Rarely | Some of the time | Often | All of the time |
| **Motivation** | 4 | My motivation to go about my regular activities is | Very poor | Poor | Fair | Good | Excellent |
| **Anxiety** | 5 | I feel anxious about my own future health in general | None of the time | Rarely | Some of the time | Often | All of the time |
| 6 | I feel anxious specifically about falling ill with COVID-19 again | None of the time | Rarely | Some of the time | Often | All of the time |
| 7 | I feel anxious about the future health of my children | None of the time | Rarely | Some of the time | Often | All of the time |
| 8 | I feel anxious about my future relationships with my family | None of the time | Rarely | Some of the time | Often | All of the time |
| 9 | I feel anxious about my future financial situation | None of the time | Rarely | Some of the time | Often | All of the time |
| 10 | I feel anxious of being dependent or a burden on my relatives or others (such as charities) | None of the time | Rarely | Some of the time | Often | All of the time |
| 11 | I feel anxious for no apparent reason | None of the time | Rarely | Some of the time | Often | All of the time |
| 12 | I feel anxious on experiencing flashbacks of traumatic events | None of the time | Rarely | Some of the time | Often | All of the time |
| **Cognition** | 13 | My ability to process information and organise my thoughts is | Very poor | Poor | Fair | Good | Excellent |
| 14 | My ability to focus/concentrate to perform house chores is | Very poor | Poor | Fair | Good | Excellent |
| **Expression** | 15 | My ability to express myself verbally is | Very poor | Poor | Fair | Good | Excellent |
| **Mental exertion** | 16 | Mental exertion makes me very tired | None of the time | Rarely | Some of the time | Often | All of the time |
| 17 | Mental exertion triggers a headache in me immediately | None of the time | Rarely | Some of the time | Often | All of the time |
| 18 | Mental exertion triggers post-exertion malaise in me | None of the time | Rarely | Some of the time | Often | All of the time |
| Physical | **Exertion** | 19 | Physical exertion gives me chest pain | None of the time | Rarely | Some of the time | Often | All of the time |
| 20 | Physical exertion makes me breathlessness | None of the time | Rarely | Some of the time | Often | All of the time |
| 21 | Physical exertion makes me very tired | None of the time | Rarely | Some of the time | Often | All of the time |
| 22 | My ability to perform daily chores due to exhaustion is | Very poor | Poor | Fair | Good | Excellent |
| 23 | My ability to participate in social events due to exhaustion is | Very poor | Poor | Fair | Good | Excellent |
| 24 | My ability to look after my spouse or children is | Very poor | Poor | Fair | Good | Excellent |
| 25 | My ability to wash and dress myself is | Very poor | Poor | Fair | Good | Excellent |
| **Pain** | 26 | I experience pain in my joints | None of the time | Rarely | Some of the time | Often | All of the time |
|  | 27 | My ability to drive at the moment | Very poor | Poor | Fair | Good | Excellent |
| 28 | My ability to use public transport due to long-COVID is | Very poor | Poor | Fair | Good | Excellent |
| **Solmonence** | 29 | I feel sleepy through out the day | None of the time | Rarely | Some of the time | Often | All of the time |
| **Smell/taste** | 30 | My ability to enjoy my food is (due to not being able to smell or taste it) | Very poor | Poor | Fair | Good | Excellent |
| 31 | My ability to enjoy alcohol is (due to not being able to smell or taste it) | Very poor | Poor | Fair | Good | Excellent |
| **Breathlessness** | 32 | When I experience breathlessness my ability to converse is affected | None of the time | Rarely | Some of the time | Often | All of the time |
| **Fine motor** | 33 | My ability to carry out delicate tasks with my fingers (like sending text messages on my phone) is | Very poor | Poor | Fair | Good | Excellent |
| **Libido** | 34 | My interest in sexual intercourse is | Very poor | Poor | Fair | Good | Excellent |
| Social | **Isolation** | 35 | My physical isolation from my family members due to long-COVID is | None | Very mild | Mild | Moderate | Severe |
| 36 | My physical isolation from my friends due to long-COVID is | None | Very mild | Mild | Moderate | Severe |
| **Relationships** | 37 | My relationship with my spouse/partner is | Very poor | Poor | Fair | Good | Excellent |
| 38 | My relationship with those who depend on me is | Very poor | Poor | Fair | Good | Excellent |
| 39 | My relationship with my friends and colleagues is | Very poor | Poor | Fair | Good | Excellent |
| 40 | My emotional exertion makes me exhausted | None of the time | Rarely | Some of the time | Often | All of the time |
| **Hobbies** | 41 | My ability to engage in my normal hobbies or recreational activities is | Very poor | Poor | Fair | Good | Excellent |
| Work | **Ability to work** | 42 | My ability to work is | Very poor | Poor | Fair | Good | Excellent |
| 43 | The impact in my career progression due to being ill or being on sick leave is | None | Very mild | Mild | Moderate | Severe |
| 44 | The loss of income due to my inability to work is | None | Very mild | Mild | Moderate | Severe |
